# Supplementary material
Source: Springer Nature journal article supplement (https://www.springermedizin.de/resource/supplementary/12913_2008_876_MOESM1_ESM.pdf/9536452)

# Traditional

# Task-Shifting

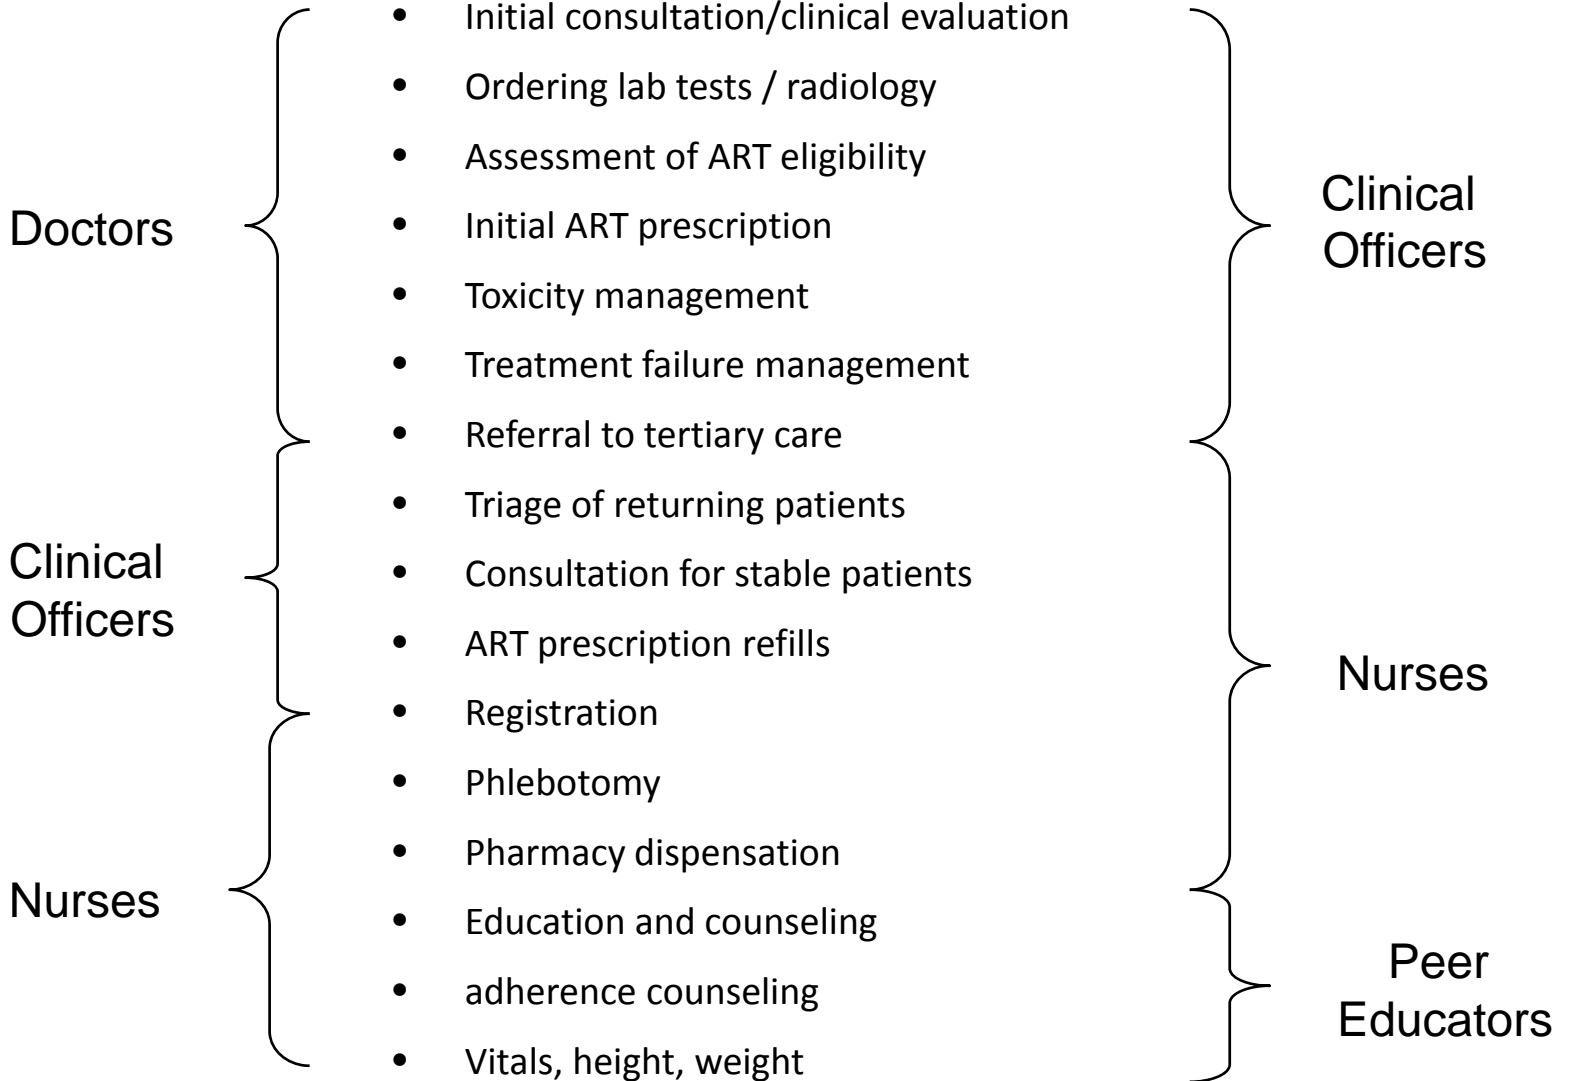

Supplement: MOESM1 [file 9536452]
